# Supplementary material for: 3D graphene oxide supramolecular hybrid hydrogel with well-ordered interior microstructure prepared by a host–guest inclusion-induced self-assembly strategy
Source: Royal Society of Chemistry journal article supplement (doi:10.1039/c6ra21256e), 2016-01-01
Supplement: c6ra21256e1.pdf [file c6ra21256e1.pdf]

## Supporting Information

### **3D graphene oxide supramolecular hybrid hydrogel with well-ordered interior microstructure prepared by a host-guest inclusion-induced self-assembly strategy**

Wei Ha, Jing Yu, Juan Chen, Yan-ping Shi\*

Key Laboratory of Chemistry of Northwestern Plant Resources of CAS and Key Laboratory for Natural Medicine of Gansu Province, Lanzhou Institute of Chemical Physics, Chinese Academy of Sciences, Lanzhou 730000, P. R. China

**Keywords:** Supramolecular hybrid hydrogel, self-assembly, host-guest inclusion, graphene oxide, well-ordered microstructure

---

\*Correspondence: Prof Yan-ping Shi, Lanzhou Institute of Chemical Physics, Chinese Academy of Sciences, Lanzhou 730000, P. R. China; E-mail: shiyp@licp.cas.cn; Fax: +86-931-4968094; Tel: +86-931-4968028

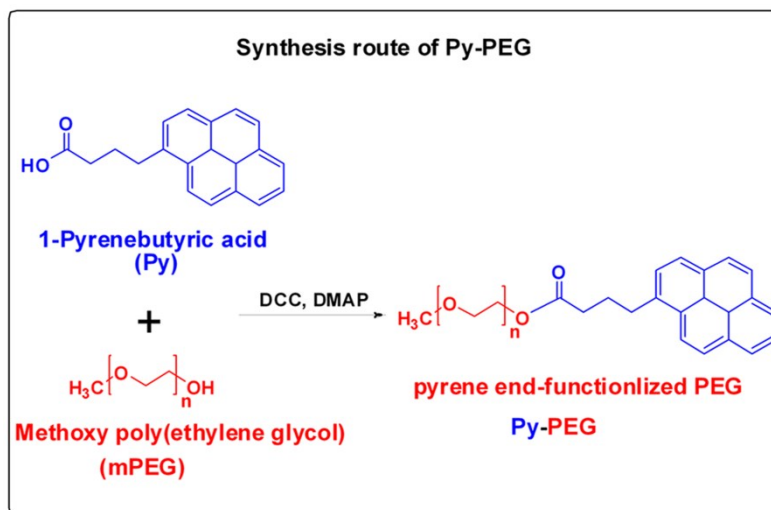

**Scheme S1.** Synthesis route of Py-PEG

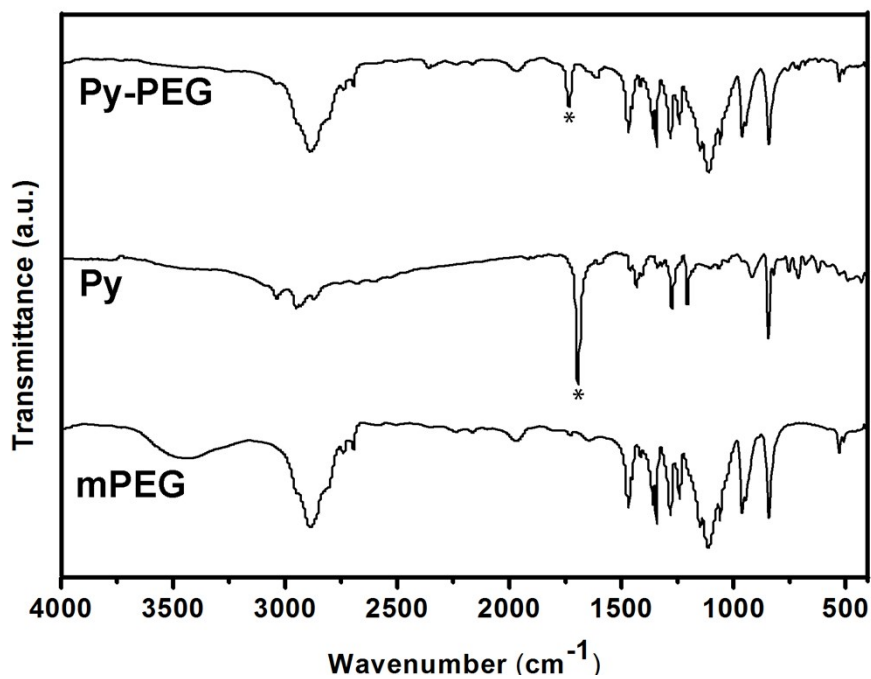

**Fig. S1** FT-IR spectra of mPEG, Py and Py-PEG. IR (KBr,  $\text{cm}^{-1}$ ): 2889 ( $\nu_{\text{C-H}}$ ), 1737 ( $\nu_{\text{C=O}}$ ), 1468 ( $\nu_{\text{C-H}}$ ), 1242 ( $\nu_{\text{C-O}}$ ), 1113 ( $\nu_{\text{C-O-O}}$ ), 1690, 843 (Pyrene group).

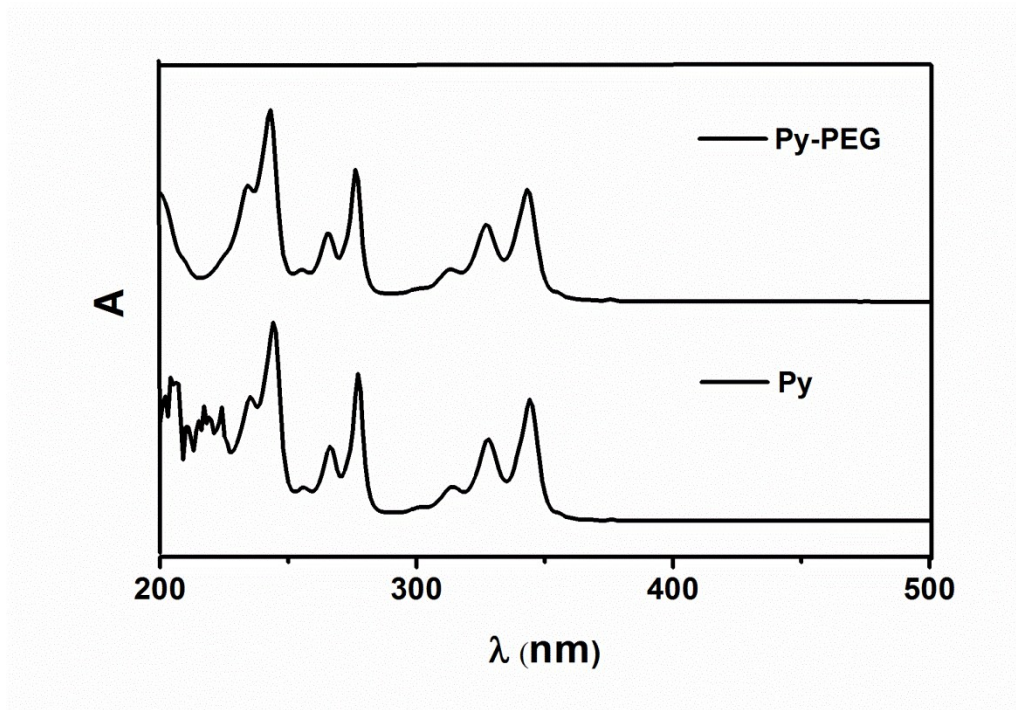

Fig. S2 UV-vis spectra of Py and Py-PEG.

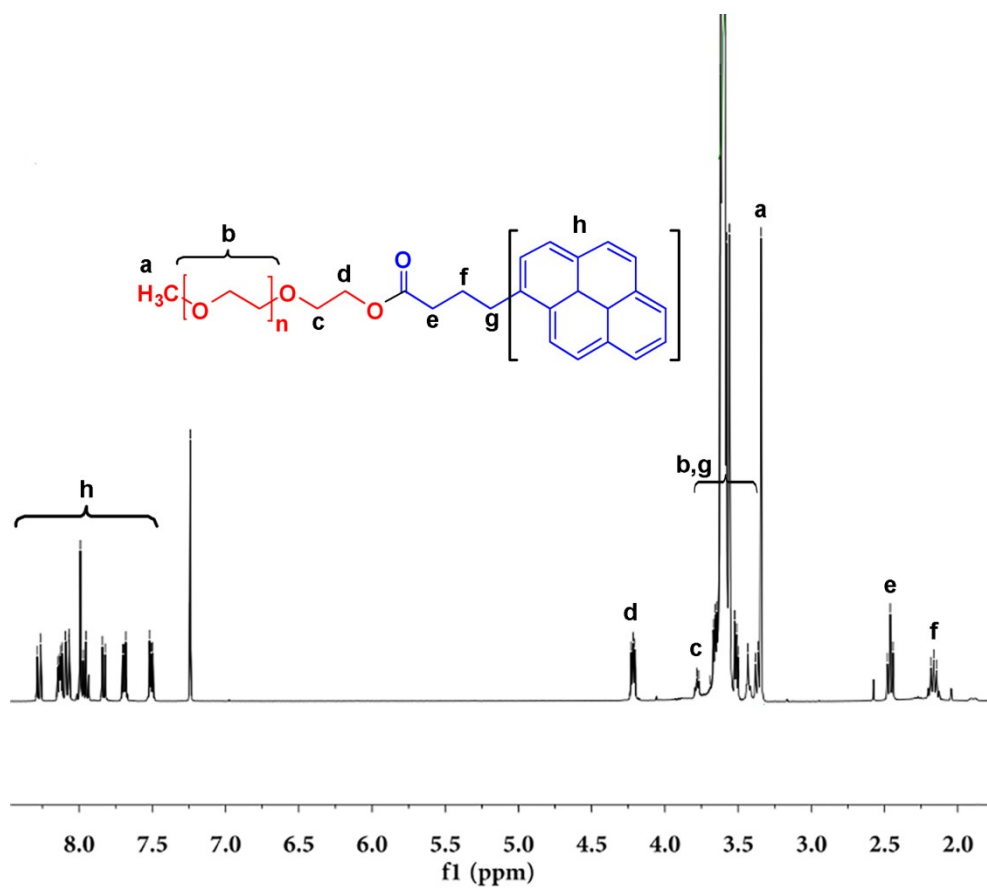

Fig. S3  $^1\text{H}$  NMR spectrum of Py-PEG in  $\text{CDCl}_3$ .

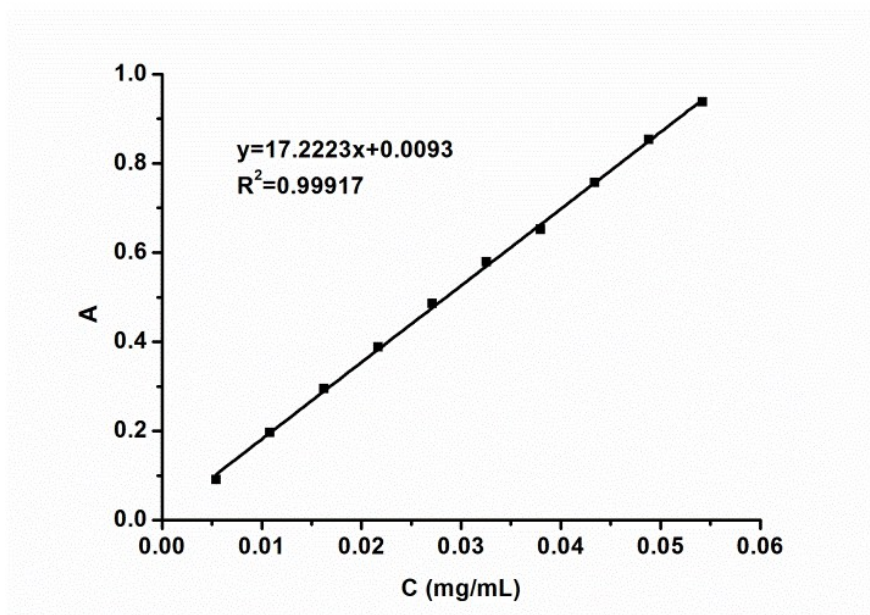

Fig. S4 Calibration curve of DOX

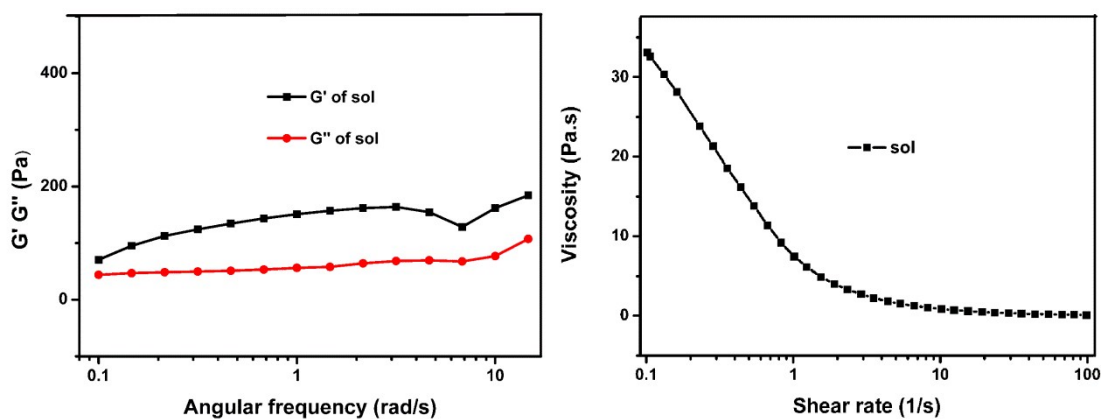

Fig. S5 Dynamic and steady rheological behaviors of the Py-PEG/ $\alpha$ -CD sol with same concentration of Py-PEG and  $\alpha$ -CD in hybrid hydrogels.

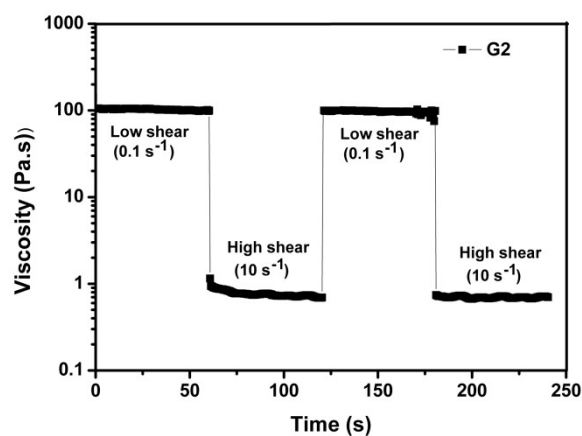

Fig. S6 Viscosity changes of G2 monitored between low shear rate ( $0.1 \text{ s}^{-1}$ ) and high shear rate ( $10 \text{ s}^{-1}$ ) at  $20 \text{ }^\circ\text{C}$
